# Supplementary material for: The Vitamin D Decrease in Children with Obesity Is Associated with the Development of Insulin Resistance during Puberty: The PUBMEP Study
Source: MDPI journal article supplement (doi:10.3390/nu13124488), 2021-12-15
Supplement: s1 [file s1]

**Supplementary Table S1.** Percentage of prepubertal and pubertal children according to vitamin D status and obesity degree.

| Variables                    | T0 (Prepubertal)        |               |            |          | T1 (Pubertal)           |               |            |          |
|------------------------------|-------------------------|---------------|------------|----------|-------------------------|---------------|------------|----------|
|                              | Vitamin D status, n (%) |               |            |          | Vitamin D status, n (%) |               |            |          |
|                              | Optimal                 | Insufficiency | Deficiency | p-value* | Optimal                 | Insufficiency | Deficiency | p-value* |
| <i>Obesity degree, n (%)</i> |                         |               |            |          |                         |               |            |          |
| Normalweight                 | 4 (25.0%)               | 7 (43.7%)     | 5 (31.3%)  |          | 2 (9.1%)                | 6 (27.3%)     | 14 (63.6%) |          |
| Overweight                   | 2 (11.1%)               | 6 (33.3%)     | 10 (55.6%) | 0.616    | 3 (13.0%)               | 7 (30.5%)     | 13 (56.5%) | 0.749    |
| Obesity                      | 8 (19.0%)               | 13 (31.0%)    | 21 (50%)   |          | 1 (3.2%)                | 10 (32.3%)    | 20 (64.5%) |          |

\*Statistical differences between prepubertal stage and pubertal stage (chi-square test).  $p<0.05$  was considered significant.

**Supplementary Table S2.** Multivariable regression analysis between change of cardiometabolic variables and change 25(OH)D levels (delta values T1-T0).

| Change Cardiometabolic Variables (T1-T0) | Change 25(OH)D levels (T1-T0) |                   |              |                             |                   |              |
|------------------------------------------|-------------------------------|-------------------|--------------|-----------------------------|-------------------|--------------|
|                                          | Unadjusted model <sup>1</sup> |                   |              | Adjusted model <sup>2</sup> |                   |              |
|                                          | B                             | 95% CI            | P-value      | B                           | 95% CI            | P-value      |
| <b>Waist circumference (cm)</b>          | -0.201                        | -0.372 to -0.030  | <b>0.022</b> | -0.206                      | -0.396 to -0.015  | <b>0.035</b> |
| <b>SBP (mmHg)</b>                        | -0.150                        | -0.316 to 0.016   | 0.077        | -0.115                      | -0.291 to 0.061   | 0.198        |
| <b>DBP (mmHg)</b>                        | -0.090                        | -0.352 to 0.173   | 0.499        | -0.066                      | -0.329 to 0.198   | 0.621        |
| <b>Glucose (mg/dL)</b>                   | 0.168                         | -0.076 to 0.412   | 0.173        | 0.048                       | -0.243 to 0.339   | 0.746        |
| <b>Insulin (mU/L)</b>                    | -0.265                        | -0.645 to 0.115   | 0.169        | -0.300                      | -0.702 to 0.102   | 0.141        |
| <b>HOMA-IR</b>                           | -1.018                        | -2.903 to 0.867   | 0.285        | -1.048                      | -3.053 to 0.958   | 0.301        |
| <b>QUICKI</b>                            | 14.265                        | -46.778 to 75.308 | 0.643        | 8.020                       | -56.788 to 72.829 | 0.806        |
| <b>TAG (mg/dL)</b>                       | -0.084                        | -0.173 to 0.004   | 0.060        | -0.098                      | -0.188 to -0.008  | <b>0.034</b> |
| <b>Cholesterol (mg/dL)</b>               | -0.019                        | -0.137 to 0.100   | 0.757        | -0.057                      | -0.179 to 0.065   | 0.354        |
| <b>HDL-c (mg/dL)</b>                     | 0.007                         | -0.164 to 0.177   | 0.939        | -0.016                      | -0.184 to 0.153   | 0.851        |
| <b>LDL-c (mg/dL)</b>                     | -0.005                        | -0.145 to 0.134   | 0.941        | -0.048                      | -0.189 to 0.094   | 0.503        |
| <b>Adiponectin (mg/L)</b>                | 0.306                         | 0.089 to 0.523    | <b>0.006</b> | 0.232                       | -0.033 to 0.497   | 0.085        |
| <b>Leptin (µg/L)</b>                     | 0.033                         | -0.324 to 0.389   | 0.856        | -0.182                      | -0.613 to 0.249   | 0.401        |

Multivariable regression analysis with change of cardiometabolic variables (T1-T0) as independent variable<sup>1</sup>. The adjusted model was adjusted for change of BMI z-score, sex, and the pubertal stage reached<sup>2</sup>. Abbreviations: BMI: Body Mass Index; HOMA-IR: Homeostasis Model Assessment for Insulin Resistance; QUICKI: Quantitative Insulin Sensitivity Check Index; DBP: Diastolic Blood Pressure; SBP: Systolic Blood Pressure; TAG: Triacylglycerols; HDL-c: High-Density Lipoproteins-cholesterol; LDL-c: Low-Density Lipoproteins-cholesterol; SE: Standard Error; CI: confidence interval.
