# Supplementary material for: The Vitamin D Decrease in Children with Obesity Is Associated with the Development of Insulin Resistance during Puberty: The PUBMEP Study
Source: MDPI journal article supplement (doi:10.3390/nu13124488), 2021-12-15
Supplement: s1 [file s1]

Supplementary Figure S1. Study design and experimental details of the study population.

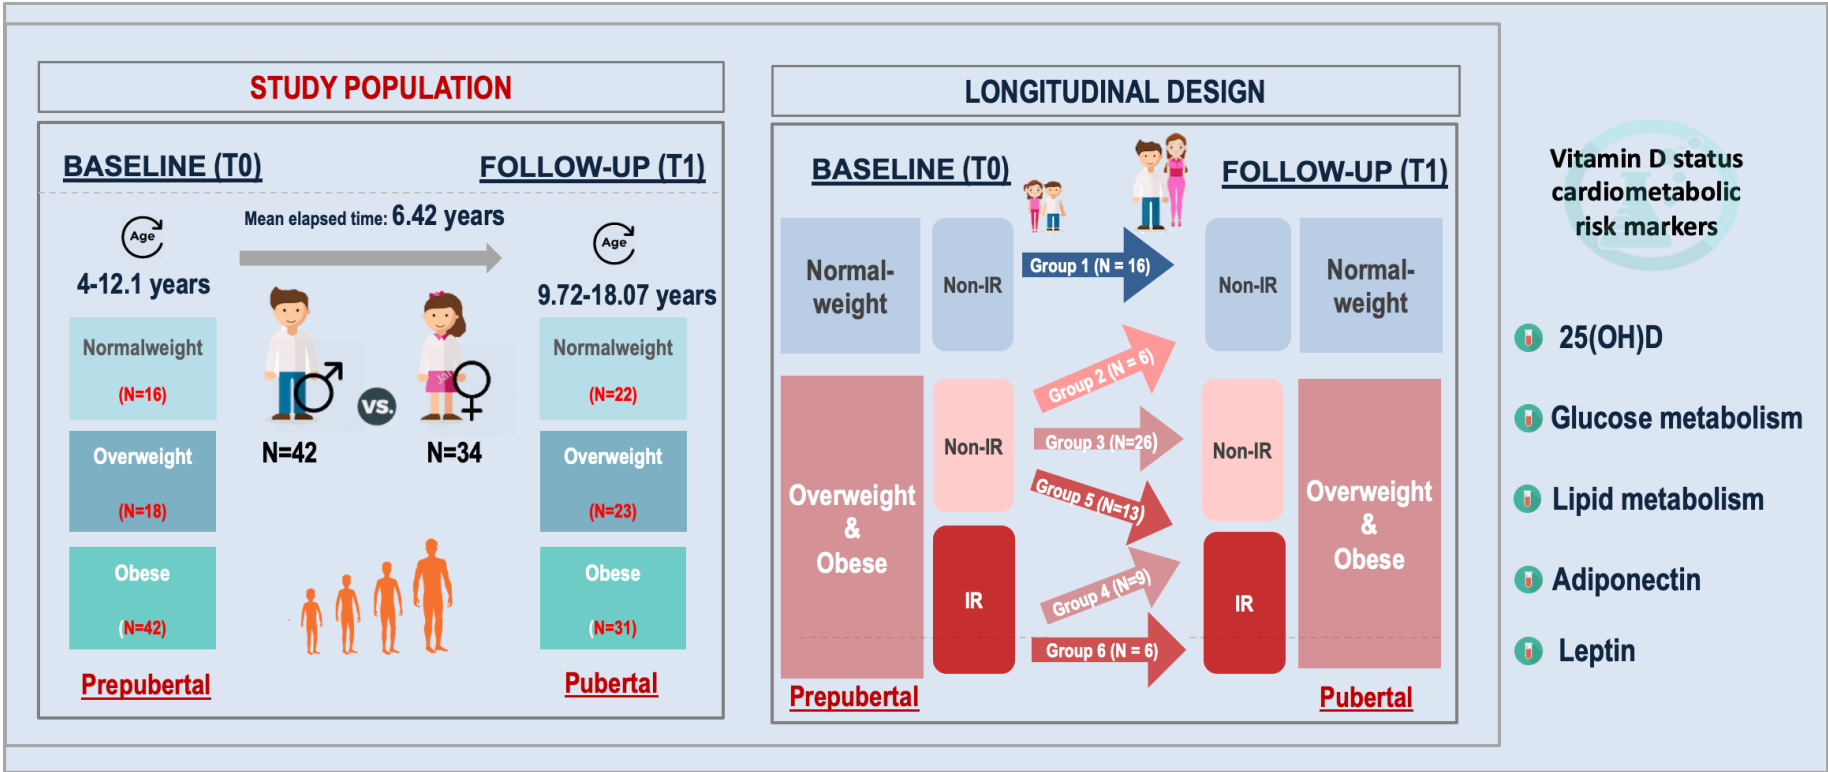

Abbreviations: IR: insulin resistance; 25(OH)D: 25-hydroxycholecalciferol.
