# Supplementary figures and images for: The Vitamin D Decrease in Children with Obesity Is Associated with the Development of Insulin Resistance during Puberty: The PUBMEP Study
Source: MDPI journal article supplement (doi:10.3390/nu13124488), 2021-12-15

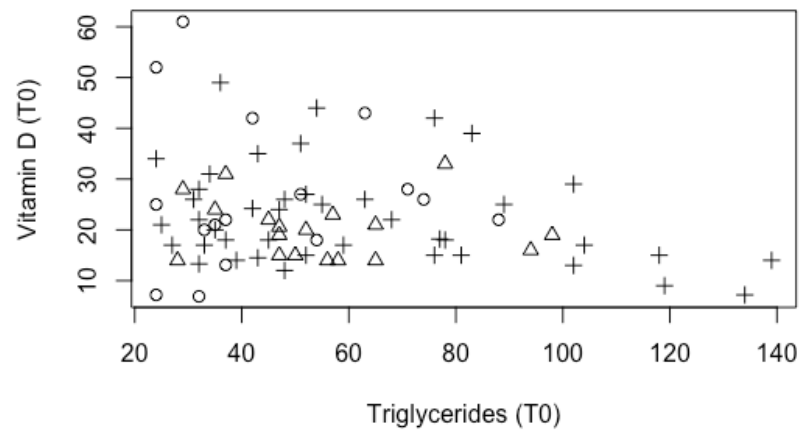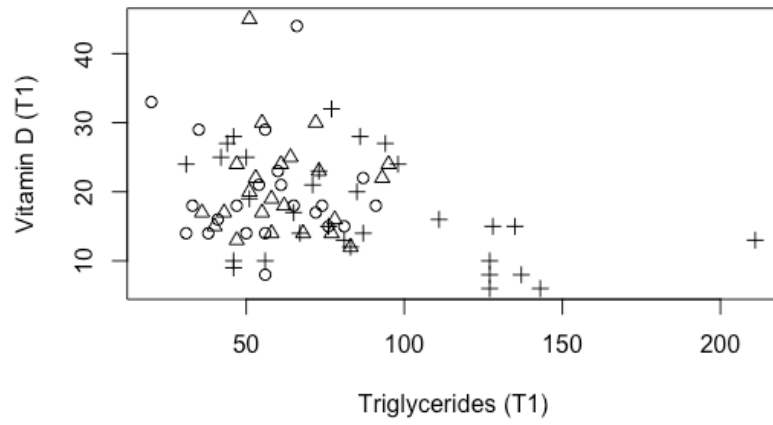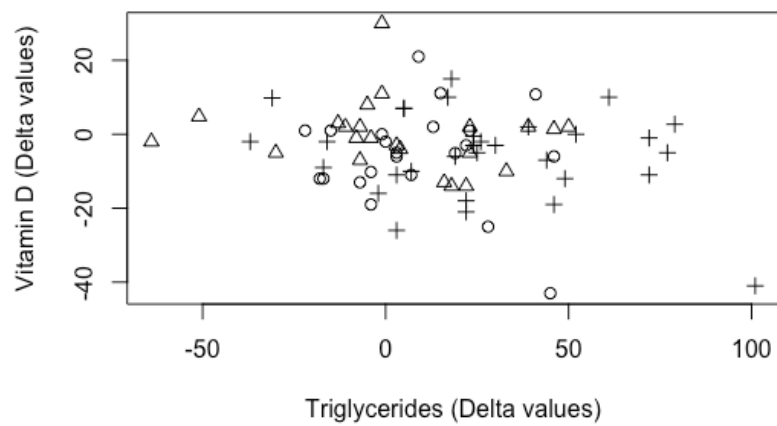

- + Children with obesity
- △ Children with overweight
- Children with normal weight

Supplement: s1 [file s1]

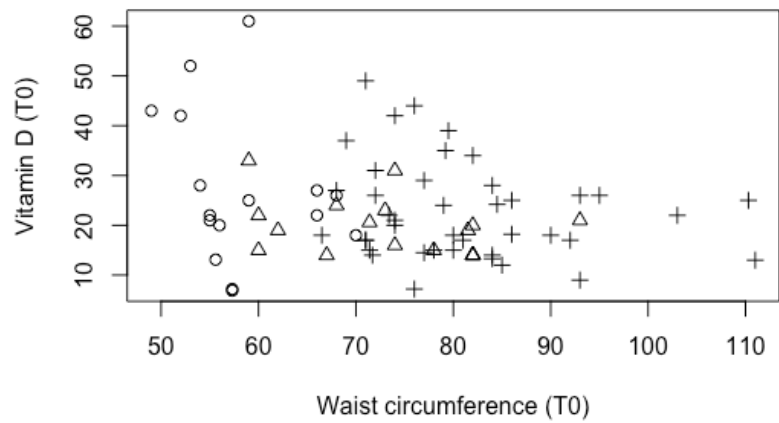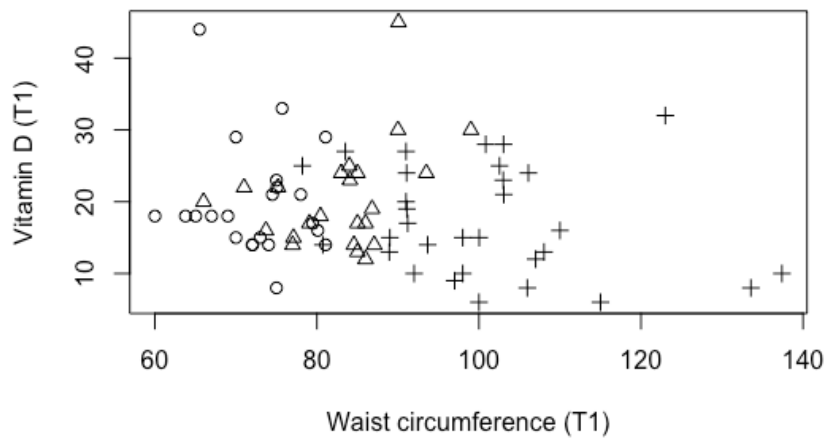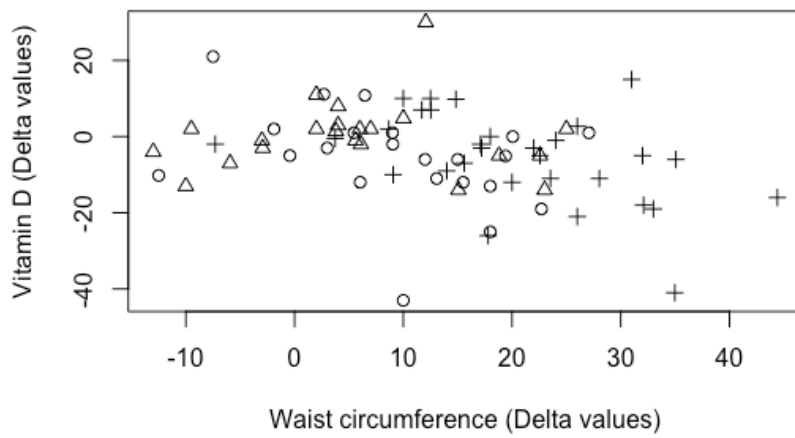

- + Children with obesity
- △ Children with overweight
- Children with normal weight

Supplement: s1 [file s1]
